# Supplementary material for: Biomimetic Hydroxyapatite Crystals Growth on Phosphorylated Chitosan Films by In Vitro Mineralization Used as Dental Substitute Materials
Source: Polymers (Basel). 2023 May 26;15(11):2470. doi: 10.3390/polym15112470 (PMC10255572; doi:10.3390/polym15112470)
Supplement: Supplementary file 1 [file polymers-15-02470-s001.zip › polymers-2358535-supplementary.pdf]

## Supporting Information

### Biomimetic Hydroxyapatite Crystals Growth on Phosphorylated Chitosan Films by *In Vitro* Mineralization Used as Dental Substitute Materials

*Fathia Rahmani*<sup>1, 2</sup>, *Omar Larbi Bouamrane*<sup>3,4, \*</sup>, *Amina Ben Bouabdallah*<sup>2,5,6</sup>, *Leonard I. Atanase*<sup>78, \*</sup>, *Abdelkader Hellal*<sup>4,9</sup>, *Aurelian Nichita Apintiliese*<sup>7</sup>

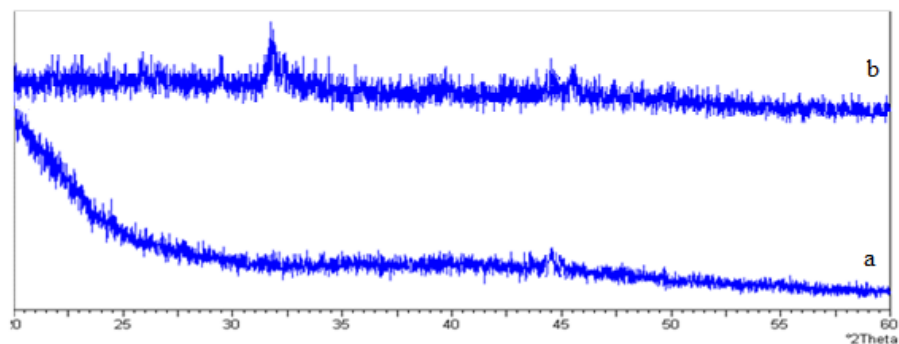

**Figure S1:** XRD spectra of (a): unmodified CS and (b) PCS films.

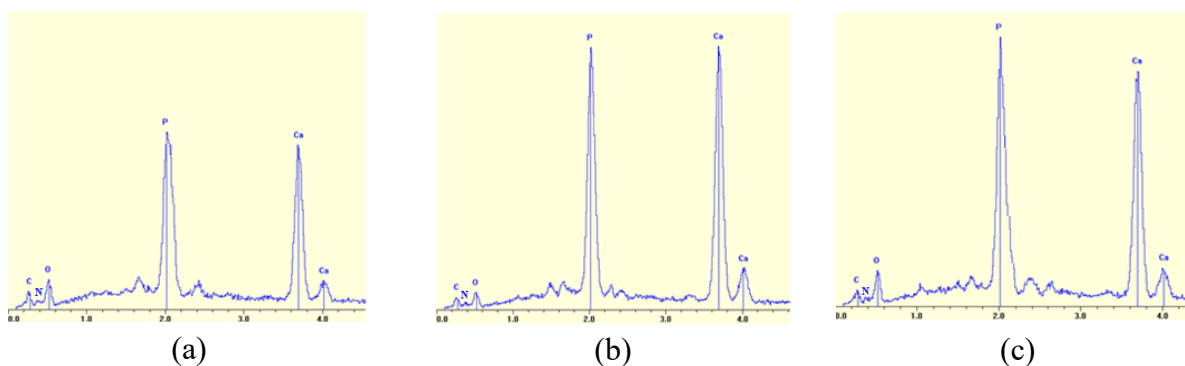

**Figure S2:** Representative EDX spectra after soaking in ASS for (a) 4 days, (b) 15 days and (c) 28 days. Ca/P ratios of coated films were for: (a) 1.11 (1.13 found per XPS), (b) 1.28 (1.22 found per XPS) (c) 1.55 (1.37 found per XPS).

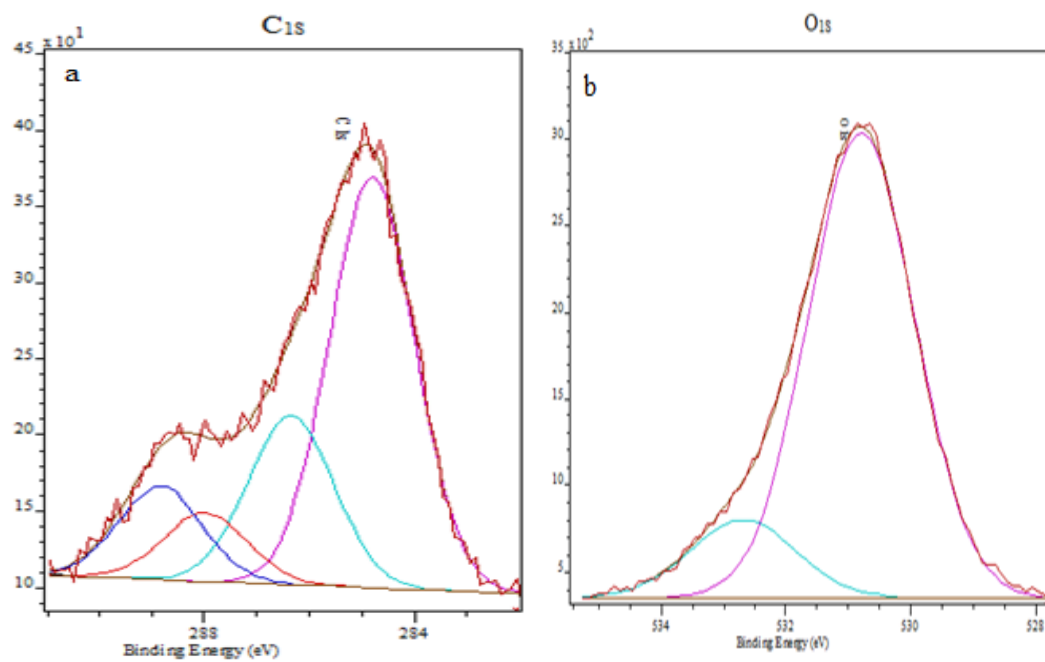

**Figure S3:** C<sub>1s</sub> (a) and O<sub>1s</sub> (b) XPS high resolution spectra of PCS-Ca(OH)<sub>2</sub> treated 28 days biomineralized in ASS.
